# Supplementary material
Source: publisher figshare collection journal article supplement (https://acs.figshare.com/ndownloader/files/4954813)

Supporting Information for Publication

Supplemental Figure 1

A

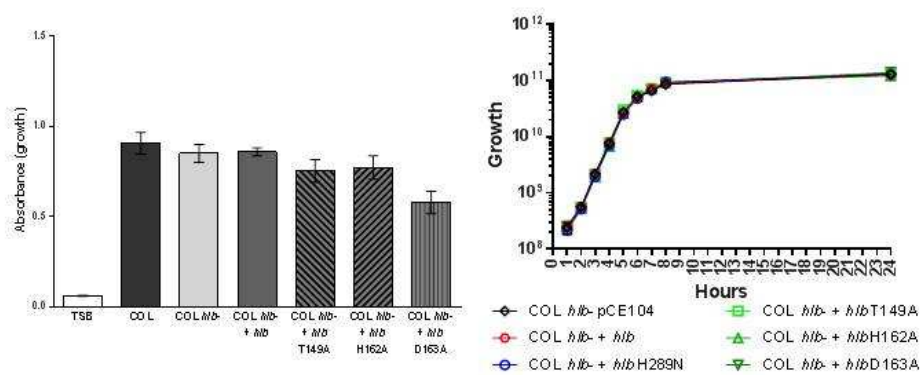

B

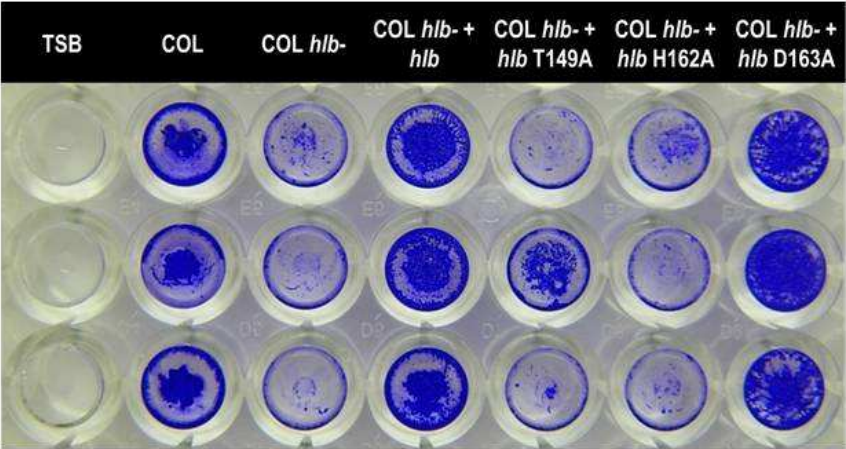

Supplemental Figure 2

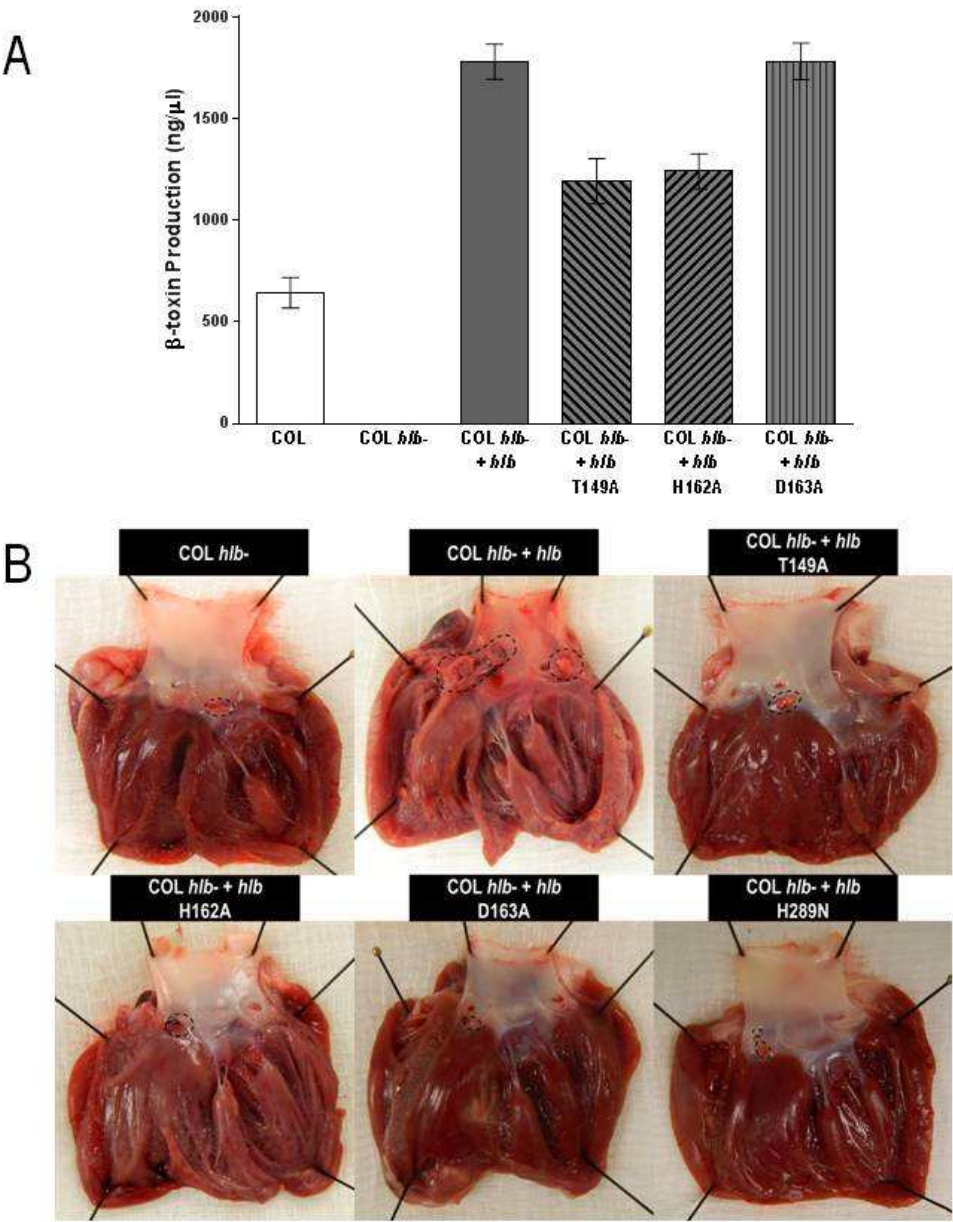

Supplement: Supplementary file 1 [file 4954813]
